# Supplementary material for: Einfluss von Osteoporose auf physische Leistungsparameter von Personen im mittleren und höheren Lebensalter – eine Querschnittstudie
Source: Springer Nature journal article supplement (doi:10.1007/s00132-022-04329-3), 2022-11-29
Supplement: MOESM1 [file 23782790]

**Tabelle:** Grundcharakteristika der Studienpopulation

| Anamnese                                          | OP                 | OP               | OP              | VG                 | p –                | p –                  |
|---------------------------------------------------|--------------------|------------------|-----------------|--------------------|--------------------|----------------------|
|                                                   | Gesamt<br>(n = 58) | 0VFs<br>(n = 34) | VFs<br>(n = 24) | Gesamt<br>(n = 60) | Wert <sup>‡</sup>  | Wert <sup>∞</sup>    |
| Alter (Jahre), MW ± SD                            | 71,7 ± 9,1         | 71,0 ± 7,8       | 72,7 ± 10,7     | 71,3 ± 9,0         | 0,503 <sup>T</sup> | 0,815 <sup>T</sup>   |
| Geschlecht<br>(männlich/weiblich)                 | 12/46              | 7/27             | 19/5            | 15/45              | 0,982 <sup>C</sup> | 0,577 <sup>C</sup>   |
| Body-Mass-Index<br>(kg/m <sup>2</sup> ), MW ±SD   | 26,7 ± 4,8         | 26,6 ± 4,4       | 26,8 ± 5,4      | 31,1 ± 5,4         | 0,880 <sup>T</sup> | < 0,001 <sup>T</sup> |
| Bone mineral density<br>(T-Score LWS),<br>MW ± SD | -3,1 ± 0,7         | -2,8 ± 0,6       | -3,4 ± 0,8      |                    | 0,001 <sup>T</sup> |                      |
| Schmerz (NRS 0 bis 10),<br>Median (Q1 – Q3)       | 3 (0 – 6)          | 1 (0 – 5)        | 5 (1,25 – 6)    | 0 (0 – 4)          | 0,029 <sup>M</sup> | 0,006 <sup>M</sup>   |
| Regelmäßige Analgetika<br>Substitution            | 11 (19 %)          | 4 (11,8 %)       | 7 (29,2 %)      | 7 (11,7 %)         | 0,096 <sup>C</sup> | 0,270 <sup>C</sup>   |
| Regelmäßiges<br>Sporttreiben                      | 32 (55,2 %)        | 23 (67,6 %)      | 9 (37,5 %)      | 29 (48,3 %)        | 0,023 <sup>C</sup> | 0,457 <sup>C</sup>   |
| Komorbiditäten                                    |                    |                  |                 |                    |                    |                      |
| Osteoarthritis obere<br>Extremität                | 23 (39,7 %)        | 8 (23,5 %)       | 15 (62,5 %)     | 12 (20 %)          | 0,003 <sup>C</sup> | 0,019 <sup>C</sup>   |
| Osteoarthritis untere<br>Extremität               | 32 (55,2 %)        | 21 (61,8 %)      | 11 (45,8 %)     | 25 (41,7 %)        | 0,230 <sup>C</sup> | 0,142 <sup>C</sup>   |
| Osteoarthritis<br>Wirbelsäule                     | 17 (29,3 %)        | 6 (17,6 %)       | 11 (45,8 %)     | 5 (8,3 %)          | 0,020 <sup>C</sup> | 0,003 <sup>C</sup>   |
| Rheumatoide Arthritis                             | 13 (22,4 %)        | 8 (23,5 %)       | 5 (20,8 %)      | 9 (15,0 %)         | 0,808 <sup>C</sup> | 0,301 <sup>C</sup>   |
| Prolapsus nuclei pulposi                          | 3 (5,2 %)          | 2 (5,9 %)        | 1 (4,2 %)       | 4 (6,7 %)          | 0,771 <sup>C</sup> | 0,731 <sup>C</sup>   |
| Arterieller Hypertonus                            | 35 (60,3 %)        | 18 (52,9 %)      | 17 (70,8 %)     | 52 (86,7 %)        | 0,170 <sup>C</sup> | 0,001 <sup>C</sup>   |

| <b>Anamnese</b>                             | <b>OP<br/>Gesamt<br/>(n = 58)</b> | <b>OP<br/>0VFs<br/>(n = 34)</b> | <b>OP<br/>VFs<br/>(n = 24)</b> | <b>VG<br/>Gesamt<br/>(n = 60)</b> | <b>p –<br/>Wert<sup>‡</sup></b> | <b>p –<br/>Wert<sup>∞</sup></b> |
|---------------------------------------------|-----------------------------------|---------------------------------|--------------------------------|-----------------------------------|---------------------------------|---------------------------------|
| Diabetes mellitus                           | 9 (15,5 %)                        | 6 (17,6 %)                      | 3 (12,5 %)                     | 25 (41,7 %)                       | 0,594 <sup>C</sup>              | 0,002 <sup>C</sup>              |
| Hyperlipoproteinämie                        | 20 (34,5 %)                       | 12 (35,3 %)                     | 8 (33,3 %)                     | 26 (43,3 %)                       | 0,877 <sup>C</sup>              | 0,324 <sup>C</sup>              |
| Übergewicht                                 | 37 (63,8 %)                       | 22 (64,7 %)                     | 15 (62,5 %)                    | 53 (88,3 %)                       | 0,863 <sup>C</sup>              | 0,002 <sup>C</sup>              |
| Hyperurikämie                               | 3 (5,2 %)                         | 3 (8,8 %)                       | 0 (0,0 %)                      | 4 (6,7 %)                         | 0,135 <sup>C</sup>              | 0,731 <sup>C</sup>              |
| Niereninsuffizienz                          | 21 (36,2 %)                       | 14 (41,2 %)                     | 7 (29,2 %)                     | 5 (8,3 %)                         | 0,349 <sup>C</sup>              | < 0,001 <sup>C</sup>            |
| Myokardinfarkt                              | 1 (1,7 %)                         | 1 (2,9 %)                       | 0 (0,0 %)                      | 4 (6,7 %)                         | 0,397 <sup>C</sup>              | 0,183 <sup>C</sup>              |
| Apoplex                                     | 1 (1,7 %)                         | 0 (0,0 %)                       | 1 (4,2 %)                      | 1 (1,7 %)                         | 0,230 <sup>C</sup>              | 0,981 <sup>C</sup>              |
| Herzinsuffizienz<br>(NYHA-Klasse I und II)  | 4 (6,9 %)                         | 2 (5,9 %)                       | 2 (8,3 %)                      | 5 (8,3 %)                         | 0,717 <sup>C</sup>              | 0,769 <sup>C</sup>              |
| Koronare Herzkrankheit                      | 4 (5,9 %)                         | 2 (5,9 %)                       | 2 (8,3 %)                      | 14 (23,3 %)                       | 0,717                           | 0,013 <sup>C</sup>              |
| Herzklappenerkrankung                       | 2 (3,4 %)                         | 1 (2,9 %)                       | 1 (4,2 %)                      | 7 (11,7 %)                        | 0,801 <sup>C</sup>              | 0,093 <sup>C</sup>              |
| Hypothyreose                                | 9 (15,5 %)                        | 4 (11,8 %)                      | 5 (20,8 %)                     | 17 (28,3 %)                       | 0,347 <sup>C</sup>              | 0,093 <sup>C</sup>              |
| Hyperthyreose                               | 4 (6,9 %)                         | 1 (2,9 %)                       | 3 (12,5 %)                     | 1 (1,7 %)                         | 0,157 <sup>C</sup>              | 0,159 <sup>C</sup>              |
| Asthma bronchiale                           | 2 (3,4 %)                         | 2 (5,9 %)                       | 0 (0,0 %)                      | 2 (3,3 %)                         | 0,227 <sup>C</sup>              | 0,972 <sup>C</sup>              |
| Chronisch obstruktive<br>Lungenerkrankung   | 5 (8,6 %)                         | 1 (2,9 %)                       | 4 (16,7 %)                     | 6 (10,0 %)                        | 0,067 <sup>C</sup>              | 0,797 <sup>C</sup>              |
| Periphere arterielle<br>Verschlusskrankheit | 3 (5,2 %)                         | 1 (2,9 %)                       | 2 (8,3 %)                      | 4 (6,7 %)                         | 0,361 <sup>C</sup>              | 0,731 <sup>C</sup>              |
| Chronisch venöse<br>Insuffizienz            | 1 (1,7 %)                         | 0 (0,0 %)                       | 1 (4,2 %)                      | 5 (8,3 %)                         | 0,230 <sup>C</sup>              | 0,102 <sup>C</sup>              |
| Hepatitis                                   | 3 (5,2 %)                         | 0 (0,0 %)                       | 3 (12,5 %)                     | 4 (6,7 %)                         | 0,034 <sup>C</sup>              | 0,731 <sup>C</sup>              |
| Alkohol Abusus                              | 0 (0,0 %)                         |                                 |                                | 3 (5,0 %)                         |                                 | 0,085 <sup>C</sup>              |

| Anamnese                                          | OP                 | OP               | OP              | VG                 | p – Wert <sup>¥</sup> | p – Wert <sup>∞</sup> |
|---------------------------------------------------|--------------------|------------------|-----------------|--------------------|-----------------------|-----------------------|
|                                                   | Gesamt<br>(n = 58) | 0VFs<br>(n = 34) | VFs<br>(n = 24) | Gesamt<br>(n = 60) |                       |                       |
| Chronisch inflammatorische intestinale Erkrankung | 1 (1,7 %)          | 1 (2,9 %)        | 0 (0,0 %)       | 0 (0,0 %)          | 0,397 <sup>C</sup>    | 0,307 <sup>C</sup>    |
| Gastroösophageale Refluxkrankheit                 | 3 (5,2 %)          | 1 (2,9 %)        | 2 (8,3 %)       | 5 (8,3 %)          | 0,361 <sup>C</sup>    | 0,495 <sup>C</sup>    |
| Malignom Erkrankung                               | 3 (5,2 %)          | 1 (2,9 %)        | 2 (8,3 %)       | 2 (3,3 %)          | 0,361 <sup>C</sup>    | 0,620 <sup>C</sup>    |
| Depression                                        | 7 (12,1 %)         | 4 (11,8 %)       | 3 (12,5 %)      | 9 (15,0 %)         | 0,933 <sup>C</sup>    | 0,642 <sup>C</sup>    |
| Epilepsie                                         | 0 (0,0 %)          |                  |                 | 1 (1,7 %)          |                       | 0,323 <sup>C</sup>    |
| Restless Legs Syndrom                             | 2 (3,4 %)          | 1 (2,9 %)        | 1 (4,2 %)       | 3 (5,0 %)          | 0,801 <sup>C</sup>    | 0,676 <sup>C</sup>    |

Die Ergebnisse sind für nicht normalverteilte Parameter als Median mit Angabe des 1. und 3. Quartils (Q1–Q3) sowie für normalverteilte Parameter als Mittelwert  $\pm$  Standardabweichung (MW  $\pm$  SD) dargestellt. Chi-Quadrat-Test<sup>C</sup>, Students-t-Test<sup>T</sup>, Mann-Whitney-U-Test<sup>M</sup>, ¥, Vergleich OP 0VFs vs. OP VFs;  $\infty$ , Vergleich OP vs. VG.

**Abkürzungen:** OP, Osteoporose; VG, Vergleichsgruppe; LWS, Lendenwirbelsäule; NRS, Numerische Rating Skala; NYHA, New York Heart Association-Classification
